# Supplementary material for: Novel multiferroicity in GdMnO3 thin films with self-assembled nano-twinned domains
Source: PubMed Central journal article supplement — Sci Rep. 2014 Nov 12;4:7019. doi: 10.1038/srep07019 (PMC4228326; doi:10.1038/srep07019), 2014-11-12
Supplement: srep07019-s1.pdf [file srep07019-s1.pdf]

## Supplementary Information

### Novel multiferroicity in GdMnO<sub>3</sub> thin films with self-assembled nano-twinned domains

Xiang Li<sup>1</sup>, Chengliang Lu<sup>2</sup>, Jiyan Dai<sup>3</sup>, Shuai Dong<sup>4</sup>, Yan Chen<sup>3</sup>, Ni Hu<sup>5</sup>, Guangheng Wu<sup>1</sup>,  
Meifeng Liu<sup>1</sup>, Zhibo Yan<sup>1</sup>, and Jun-Ming Liu<sup>1,6</sup>

<sup>1</sup>*Laboratory of Solid State Microstructures, Nanjing University, Nanjing 210093, China,*

<sup>2</sup>*School of Physics, Huazhong University of Science and Technology, Wuhan 430074, China*

<sup>3</sup>*Department of Applied Physics, Hongkong Polytechnic University, Hongkong, China*

<sup>4</sup>*Department of Physics, Southeast University, Nanjing 211189, China*

<sup>5</sup>*Department of Physics, Hubei University of Technology, Wuhan 430068, China*

<sup>6</sup>*Institute for Quantum Materials, Hubei Polytechnic University, Huangshi 435000, China*

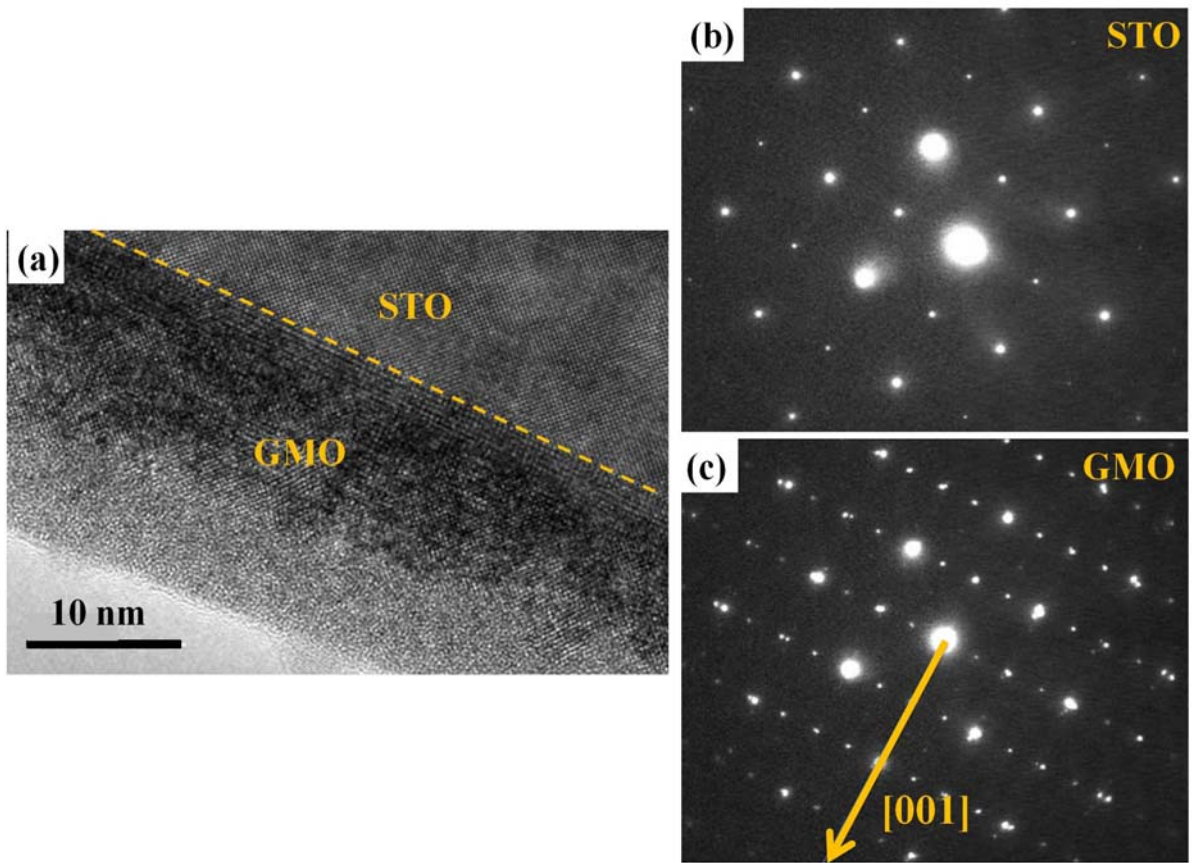

**Supplementary Figure S1:** (a) Cross-section TEM of a 10 nm GMO/STO (001) film. Sharp substrate-film interface (indicated by dashed line) can be seen. The corresponding electron diffraction patterns of the film (b) and the substrate (c) show well aligned diffraction spots, confirming the epitaxial growth of the GMO thin film on STO.

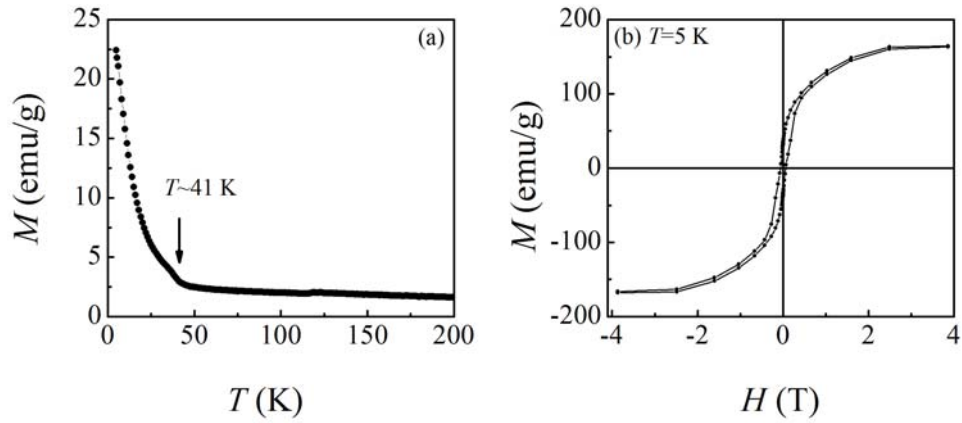

**Supplementary Figure S2:** Magnetization as a function of temperature (a) and magnetic field (b) for the 10 nm thick film. The magnetic properties of the film with  $t = 10$  nm are quite similar to that of the film with  $t = 110$  nm (shown in Fig. 4 in the main text), including the abrupt increase in  $M(T)$  curves and the hysteresis in  $M(H)$  curves. Quantitatively, the film with  $t = 10$  nm has a slightly higher onset temperature of the abrupt increase ( $\sim 41$  K), but a smaller coercive field (0.6 kOe) than the film with  $t = 110$  nm.

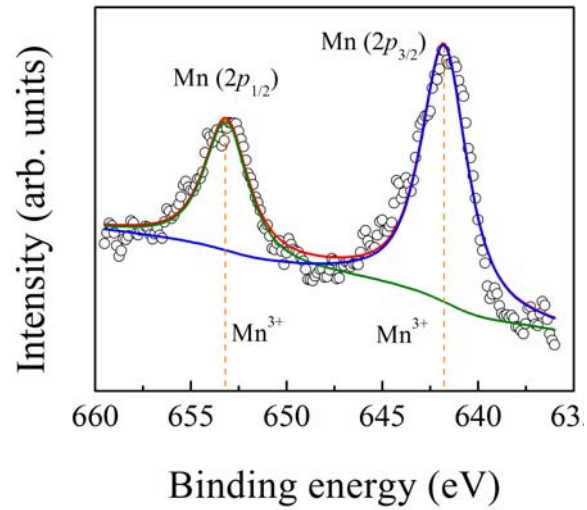

**Supplementary Figure S3:** XPS spectra for the film with  $t=110$  nm, on which all the measurements were performed. The circles are the experimental data, and the curves are fitting curves. Only  $\text{Mn}^{3+}$  was detected in the film, which is the same as the case in bulk  $\text{GdMnO}_3$  crystals.
